# Supplementary material for: GPVI surface expression and signalling pathway activation are increased in platelets from obese patients: Elucidating potential anti-atherothrombotic targets in obesity
Source: PubMed Central journal article supplement (PMC6403451; doi:10.1016/j.atherosclerosis.2018.12.023), 2019-02
Supplement: mmc1.pdf [file mmc1.pdf]

# **SUPPLEMENTARY MATERIAL**

## **Platelet agonists**

The following agonists were used: Crosslinked collagen-related peptide (CRP), with the sequence Gly-Cys-Hyp-(Gly-Pro-Hyp)<sub>10</sub>-Gly-Cys-Hyp-Gly-NH<sub>2</sub>, was provided by Dr. Richard W. Farndale, from the University of Cambridge (UK). Collagen Reagent HORM® Suspension (KRH) was purchased from Takeda Austria GmbH (Austria). Thrombin and ADP were purchased from Sigma (Sigma-Aldrich, St. Louis, MO) and arachidonic acid from Cayman Chemical (Michigan, USA).

Rhodocytin was provided by Johannes A. Eble, from Center for Molecular Medicine, Excellence Cluster Cardio-Pulmonary System, Frankfurt University Hospital, Frankfurt am Main, Germany.

## **Supplementary Methods**

### **2D-DIGE**

Six gels (technical replicates) were run in the experiment with a total of 150 µg of mixed labelled protein per gel. These protein mixtures contained 50 µg of protein from each sample (10 obese pooled and 10 lean pooled matched-controls) randomly labeled with 400 pmol minimal CyDye DIGE fluors (Cy3 and Cy5), and 50 µg of a pool of both conditions (25 µg from obese patients and 25 µg from lean controls) labeled with 400 pmol Cy2 (internal standard). Labelling was performed for 30 min on ice in the dark. The reaction was stopped with 1 µl of 10 mM lysine acting for 10 min on ice in the dark. After labelling step, the three samples were pooled and an equal volume of 2× sample buffer was added (65 mM CHAPS, 2 M thiourea, 5 M urea, 0.15 M NDSB-

256, 130 mM DTT, 4 mM tributylphosphine, 1 mM sodium vanadate, 0.1 mM sodium fluoride, and 1 mM benzamidine).

After mixing, the tube was left for 10 min on ice in the dark. For reswelling, samples were diluted up to a total of 500  $\mu$ l of 2D Sample buffer (5 M urea, 2 M thiourea, 2 mM tributylphosphine, 65 mM DTT, 65 mM CHAPS, 0.15 M NDSB-256, 1 mM sodium vanadate, 0.1 mM sodium fluoride, and 1 mM benzamidine, final concentration), and ampholytes (Servalyt 4–7) were added to a final concentration of 1.6% (v/v). IPG strips were rehydrated with the samples for 16 h in the dark. Isoelectric focusing (IEF) was run on 24 cm, pH 4–7 IPG strips (GE Healthcare) powered by a Multiphor II (GE Healthcare) for 64.9 kVh at 17 °C.

Following the first dimension, IPG strips were immediately equilibrated for 15 min in reduction buffer (6 M urea, 50 mM tris pH 8.8, 30% glycerol, 2% w/v SDS, 65 mM DTT and traces of bromophenol blue) and then for 15 min in alkylation buffer (6 M urea, 50 mM tris pH 8.8, 30% glycerol, 2% w/v SDS, 135 mM iodoacetamide and traces of bromophenol blue) with gentle agitation; all steps in the dark. IPG strips were washed out with ultrapure water and placed on top of the second dimension gels, embedded with 0.5% melted agarose.

Proteins were separated in the second dimension by SDS-polyacrylamide gel electrophoresis (PAGE) on 11% polyacrylamide gels at run conditions of 10°C, 20 mA per gel for 1 h, followed by 40 mA per gel for 4 h by using an Ettan Dalt 6 system (GE Healthcare). Following electrophoresis gels were scanned directly in a Typhoon FLA 7000 scanner (GE Healthcare). After imaging, gels were fixed in 10% methanol/ 7% acetic acid for 1 hour, and stained overnight with Sypro Ruby fluorescent dye for spot picking.

## Differential Image Analysis

Scanned images were processed with Progenesis SameSpots software (v 4.5) from Nonlinear Dynamics Ltd. (Newcastle, UK) in order to find real differences between both conditions of study. Both manual and automatic alignment was used to align the images. SameSpots detects the spots simultaneously across all images generating a master gel list containing all the features. All gels were compared with each other and fold values as well as P-values of all spots were calculated by SameSpots software using one way ANOVA analysis. Differential expression of a protein present in the gels was considered significant when the fold change was at least 1.2 and the P-value was below 0.05.

## Mass Spectrometric Analysis

Protein identifications were by LC-MS/MS. Digested peptide mixtures dissolved in 0.1% formic acid were separated in an EASY-nLC (Proxeon, Bruker Daltonik GmbH) with a reverse phase nanocolumn (Easy column SC200) from Proxeon (see below for more details).

### LC parameters for separation of tryptic peptides

#### LC settings

|                          |                                                                                         |
|--------------------------|-----------------------------------------------------------------------------------------|
| <i>LC system</i>         | Easy-nLC PROXEON                                                                        |
| <i>Trap column</i>       | Easy-column SC001 L 2 cm, ID 100 $\mu$ m, 5 $\mu$ m, 120 A, C18-A1 from Proxeon         |
| <i>Analytical column</i> | Easy column SC200 C18 3 $\mu$ m 120A 360 $\mu$ m OD/75 $\mu$ m ID, L=10cm) from Proxeon |
| <i>Flow rate</i>         | 300 nl/min                                                                              |

|                 |                                                              |
|-----------------|--------------------------------------------------------------|
| <b>Eluents</b>  | A:0.1% FA in water B:0.1%FA in ACN                           |
| <b>Gradient</b> | 5% (t=0 min), 35% (t=32 min), 50% (t=37 min), 100% (t=38min) |

Ionized peptides were analyzed in a CID-ETD ion trap mass spectrometer (Bruker Daltonics), equipped with a Nanosprayer ionization source that was used for data-dependent MS/MS experiments. Spectra were acquired in Enhanced Resolution mode. Further acquisition parameters are listed in below.

### MS and MS/MS settings used for acquisition with the Amazon ETD

#### *Acquisition parameters*

|                                      |                                                                                                                                 |
|--------------------------------------|---------------------------------------------------------------------------------------------------------------------------------|
| <b>Source</b>                        | Nanosprayer <sup>®</sup>                                                                                                        |
| <b>MS settings:</b>                  |                                                                                                                                 |
| <b>Scan mode</b>                     | Enhanced resolution mode (8,100 m/z s <sup>-1</sup> )                                                                           |
| <b>Scan range</b>                    | 50-3000 Da                                                                                                                      |
| <b>Spectra averages</b>              | 5 (Rolling averaging: 1)                                                                                                        |
| <b>MS/MS settings:</b>               |                                                                                                                                 |
| <b>Scan mode</b>                     | UltraScan                                                                                                                       |
| <b>Scan range</b>                    | 100-3,000 m/z                                                                                                                   |
| <b>No. of precursor ions</b>         | 3 (active exclusion after 1 spectrum, release after 0.2 min; reconsider precursor, if current intensity/previous intensity >1%) |
| <b>Isolation width</b>               | 4 m/z                                                                                                                           |
| <b>Spectral averages</b>             | 2                                                                                                                               |
| <b>Fragmentation amplitude (CID)</b> | 30-300%                                                                                                                         |
| <b>Fragmentation time (ETD)</b>      | 100 ms                                                                                                                          |

Automated analysis of mass data was achieved by Data Analysis 4.0 and BioTools 3.2 from Bruker Daltonik GmbH. Database search was performed with the Mascot v2.3.0 search tool (Matrix Science, London, UK) screening SwissProt (SwissProt\_2016\_09.fasta). Searches were restricted to human taxonomy allowing carbamidomethyl cysteine as a fixed modification and oxidized methionine as potential variable modification. Both the precursor mass tolerance and the MS/MS tolerance were set at 0.3 and 0.4 Da, respectively, allowing 1 missed tryptic cleavage site. All spectra and database results were manually inspected in detail using the above software, especially in the case of identifications based on one peptide hit. For the latter, positive identification by MS was only accepted when more than 50% y-ions (CID fragmentation) or z-ions (ETD fragmentation) were obtained for a peptide comprising at least eight amino acids long and no missed tryptic cleavage site. Positive hits corresponded to Mascot scores > 40 plus the fulfillment of the above criteria.

For MALDI analysis, dried peptides were dissolved in 4  $\mu$ L of 0.5% formic acid. Equal volumes (0.5  $\mu$ L) of peptide and matrix solution (3 mg alpha-cyano-4-hydroxycinnamic acid ( $\alpha$ -CHCA) dissolved in 1 mL of 50% acetonitrile in 0.1% trifluoroacetic acid) were deposited using the thin layer method, onto a 384 Opti-TOF 123x81 mm MALDI plate (Applied Biosystems) and allowed to dry at room temperature. Mass spectrometric data were obtained in an automated analysis loop using a 4800 MALDI-TOF/ TOF analyzer (Applied Biosystems). Spectra were acquired in the reflector positive-ion mode with a Nd:YAG, 355nm wavelength laser, at 200 Hz laser frequency, and 1000 to 2000 individual spectra were averaged. The experiments were acquired uniform with fixed laser intensity. All MSMS spectra were performed by

selecting the precursors with a relative resolution of 300 (FWHM) and metastable suppression.

Automated analysis of mass data was achieved by using the 4000 Series Explorer Software V3.5 (Applied Biosystems). Internal calibration of MALDI-TOF mass spectra was performed using two trypsin autolysis ions with  $m/z = 842.510$  and  $m/z = 2211.105$ . For MALDI-MS/MS, calibrations were performed with fragment ion spectra obtained for Angiotensin II (peptide mix, calibration standard, Bruker). MS and MS/MS spectra data were combined through the Protein Pilot Explorer Software v4.5. Database search was performed with the Mascot v2.1 search tool (Matrix Science, London, UK) screening SwissProt (release version 2016-05; February, 551193 entries). Searches were restricted to Human taxonomy allowing carbamidomethyl cysteine as a fixed modification and oxidized methionine as potential variable modification. Both the precursor mass tolerance and the MS/MS tolerance were set at 100 ppm and 0.3 Da, respectively, allowing 1 missed tryptic cleavage site. MALDI-MS(/MS) spectra and database search results were manually inspected in detail using the previous software. For combined MS and MS/MS data, identifications were accepted when Confidence Interval (C.I.%) of Protein Pilot software was 95% or higher. Since Protein Scores and Ion Scores from different searches cannot be directly compared, Protein Pilot software calculates this C.I.% in order to combine results from MS and MS/MS database searches. This coefficient value means that the probability that the observed match is a random event is lower than 5%. For PMF spectra, identifications were also accepted when (C.I.%) of Protein Pilot software was 99% or higher.

## **Immunoprecipitation**

Basal and activated platelets ( $8 \times 10^8$  platelets/mL, 500  $\mu$ L per immunoprecipitation; activations with CRP-XL 1  $\mu$ g/mL, 90sec) were lysed with 500  $\mu$ L NP40-based lysis buffer, (0.3M Sodium Chloride, 20mM Tris, 2mM EGTA, 2mM EDTA, 2% (v/v) NP-40, pH 7.5). Activations were under non-aggregating conditions in the presence of integrilin (9  $\mu$ M). For phosphotyrosine (p-Tyr) immunoprecipitations, 5  $\mu$ g of agarose-conjugated 4G10 monoclonal anti-phosphotyrosine antibody (EMD Millipore Corporation, Billerica, MA, USA) were added to the lysates per immunoprecipitation and samples rotated overnight at 4 °C. Before the addition of the antibodies, samples were precleared with 25  $\mu$ L of Protein A-Sepharose (50% w/v in TBS-T (20mM Tris-HCl (pH 7.6), 137mM NaCl, and 0.1% v/v Tween 20)) at 4 °C for 60 minutes with end-over-end mixing.

After immunoprecipitations, proteins were eluted from the beads in 2X Laemmli sample buffer (4% w/v SDS, 10% v/v 2-mercaptoethanol, 20% v/v glycerol, 50 mM Tris, pH 6.8) and resolved on 4–12% NuPAGE Bis-Tris gradient gels (Invitrogen, Carlsbad, CA, USA) for western blotting.

**Supplementary Table 1. Clinical characteristics of obese and lean-matched control- proteomics study.**

| <b>Variable</b>                | <b>Obese patients<br/>(N =10)</b> | <b>Lean-matched<br/>controls<br/>(N =10)</b> | <b>P value</b> |
|--------------------------------|-----------------------------------|----------------------------------------------|----------------|
| Age (years)                    | 33.50 ± SD 11.90                  | 33.50 ± SD 11.30                             | 1              |
| Females (%)                    | 90%                               | 90%                                          | 1              |
| BMI***                         | 46.30 ± SD 6.07                   | 21.83 ± SD 1.96                              | <0.001         |
| Diabetes (%)                   | 10%                               | 0%                                           | -              |
| HbA1c (%)                      | 5.39 ± SD 0.45 (n=7)              | -                                            | -              |
| <b>Laboratory Measurements</b> |                                   |                                              |                |
| Hemoglobin (g/dl)              | 13.46 ± SD 0.71                   | 13.50 ± SD 0.85                              | 0.939          |
| Leukocytes/μL*                 | 8.70 ± SD 2.62                    | 7.75 ± SD 6.58                               | 0.028          |
| Platelets/μL                   | 255400 ± SD 60110                 | 242400 ± SD 60120                            | 0.762          |
| Mean Platelet<br>Volume (fL)*  | 10.07 ± SD 1.60                   | 8.70 ± SD 1.49                               | 0.037          |
| Glucose (mg/dl)                | 83.10 ± SD 13.33                  | 83.60 ± SD 8.04                              | 0.570          |
| Creatinin (mg/dl)              | 1 ± SD 0.0                        | 0.72 ± SD 0.09                               | 0.058          |
| Cholesterol (mg/dl)            | 175.10 ± SD 24.48                 | 194.50 ± SD 37.88                            | 0.211          |
| <b>Chronic Treatments</b>      |                                   |                                              |                |
| Antiplatelets (%)              | 0%                                | 0%                                           |                |
| ACE Inhibitors (%)             | 0%                                | 0%                                           |                |
| Benzodiazepines<br>(%)         | 0%                                | 0%                                           |                |
| Celecoxib (%)                  | 0%                                | 0%                                           |                |
| Statins (%)                    | 0%                                | 0%                                           |                |
| Antidepressants (%)            | 0%                                | 0%                                           |                |
| Muscle relaxant (%)            | 0%                                | 0%                                           |                |

a. Data are presented as the median ± SD or percentage of patients. \*  $p < 0.05$ .

b. Patients with glucose levels below 80 mg/dL were not requested HbA1c measuring.



**Supplementary Table 2. Clinical characteristics of obese and lean-matched controls validation and functional studies.**

| <b>Variable</b>                | <b>Obese patients<br/>(N =34)</b> | <b>Lean-matched controls<br/>(N =34)</b> | <b>P value</b> |
|--------------------------------|-----------------------------------|------------------------------------------|----------------|
| Age (years)                    | 38.97 ± SD 12.29                  | 38.05 ± SD 11.44                         | 0.854          |
| Females (%)                    | 82.35%                            | 82.35%                                   | 1              |
| BMI***                         | 46.58 ± SD 6.62                   | 22.14 ± SD 1.75                          | <0.0001        |
| Diabetes (%)                   | 2.94%                             | 0%                                       | -              |
| HbA1c (%)                      | 5.3 ± SD 0.44 (n=29)              | -                                        | -              |
| <b>Laboratory Measurements</b> |                                   |                                          |                |
| Hemoglobin (g/dl)              | 14.11 ± SD 1.02                   | 13.75 ± SD 1.24 (n=32)                   | 0.167          |
| Leukocytes/μL*                 | 8.65 ± SD 2.22                    | 6.8 ± SD 3.99 (n=32)                     | 0.0133         |
| Platelets/μL                   | 259350 ± SD 60980                 | 242750 ± SD 51570 (n=32)                 | 0.205          |
| Mean Platelet Volume (fL)**    | 8.47 ± SD 1.16                    | 9.63 ± SD 1.44 (n=31)                    | 0.0022         |
| Glucose (mg/dl)                | 88.76 ± SD 14.23                  | 83.97 ± SD 8.45 (n=31)                   | 0.111          |
| Creatinin (mg/dl)              | 0.68 ± SD 0.14                    | 0.74 ± SD 0.12 (n=31)                    | 0.083          |
| Cholesterol (mg/dl)            | 186.8 ± SD 33.27                  | 197.37 ± SD 34.54 (n=32)                 | 0.197          |
| <b>Chronic Treatments</b>      |                                   |                                          |                |
| Antiplatelets (%)              | 0%                                | 0%                                       |                |
| ACE Inhibitors (%)             | 6.25%                             | 0%                                       |                |
| Benzodiazepines (%)            | 21.8%                             | 0%                                       |                |
| Celecoxib (%)                  | 3.1%                              | 0%                                       |                |
| Statins (%)                    | 3.1%                              | 3.1%                                     |                |
| Antidepressants (%)            | 6.25%                             | 3.1%                                     |                |
| Muscle relaxants (%)           | 3.1%                              | 0%                                       |                |

a. Data are presented as the median ± SD or percentage of patients. \*  $p < 0.05$ ;

\*\*  $p < 0.001$ ; \*\*\*  $p < 0.0001$ .

b. Patients with glucose levels below 80 mg/dL were not requested HbA1c measuring.

**Supplementary Table 3: Platelet proteins differentially regulated in obese patients versus lean healthy controls.**

| Uniprot code | Name                                              | Biological process                                                                    | Spot | Fold Change |
|--------------|---------------------------------------------------|---------------------------------------------------------------------------------------|------|-------------|
| ACTB_HUMAN   | Actin, cytoplasmic 1                              | Platelet aggregation                                                                  | 4405 | +1.3        |
|              |                                                   |                                                                                       | 4325 | +1.3        |
|              |                                                   |                                                                                       | 2021 | +1.2        |
|              |                                                   |                                                                                       | 2550 | +1.2        |
|              |                                                   |                                                                                       | 4461 | +1.2        |
| ACTG_HUMAN   | Actin, cytoplasmic 2                              | Platelet aggregation                                                                  | 2550 | +1.2        |
|              |                                                   |                                                                                       | 4461 | +1.2        |
| ACTN1_HUMAN  | Alpha-actinin-1                                   | Platelet degranulation and platelet formation                                         | 4465 | +1.2        |
|              |                                                   |                                                                                       | 4405 | +1.3        |
|              |                                                   |                                                                                       | 4403 | +1.3        |
| ALBU_HUMAN   | Serum albumin                                     | Regulation of the colloidal osmotic pressure of blood                                 | 4424 | -1.2        |
|              |                                                   |                                                                                       | 4356 | +1.3        |
| ANXA5_HUMAN  | Annexin A5                                        | Hemostasis                                                                            | 4356 | +1.3        |
| ARK72_HUMAN  | Aflatoxin B1 aldehyde reductase member 2          | Carbohydrate metabolic process                                                        | 2898 | -1.2        |
| DCTN2_HUMAN  | Dynactin subunit 2                                | Cell proliferation                                                                    | 4354 | -1.2        |
| DPYL2_HUMAN  | Dihydropyrimidinase-related protein 2             | Endocytosis                                                                           | 1858 | -1.2        |
| FIBB_HUMAN   | Fibrinogen beta chain                             | Platelet aggregation                                                                  | 2547 | +1.2        |
|              |                                                   |                                                                                       | 2077 | +1.2        |
| FIBG_HUMAN   | Fibrinogen gamma chain                            | Platelet aggregation                                                                  | 4465 | +1.2        |
|              |                                                   |                                                                                       | 4325 | +1.3        |
|              |                                                   |                                                                                       | 2232 | +1.3        |
|              |                                                   |                                                                                       | 4304 | +1.2        |
|              |                                                   |                                                                                       | 4344 | +1.2        |
| GELS_HUMAN   | Gelsolin                                          | Actin filament capping                                                                | 4508 | -1.2        |
|              |                                                   |                                                                                       | 4505 | -1.2        |
| GPDM_HUMAN   | Glycerol-3-phosphate dehydrogenase, mitochondrial | Triglyceride catabolic process                                                        | 4400 | -1.4        |
| HEM2_HUMAN   | Delta-aminolevulinic acid dehydratase             | Response to oxidative stress                                                          | 2932 | -1.2        |
| HSPB1_HUMAN  | Heat shock protein beta-1                         | Negative regulation of oxidative stress-induced intrinsic apoptotic signaling pathway | 4361 | -1.2        |
|              |                                                   |                                                                                       | 3287 | -1.2        |
| ITA2B_HUMAN  | Integrin $\alpha$ IIb                             | Platelet aggregation                                                                  | 993  | +1.2        |
| LYSC_HUMAN   | Lysozyme C                                        | Inflammatory response                                                                 | 1006 | +1.2        |
|              |                                                   |                                                                                       | 4320 | -1.3        |
| ODO2_HUMAN   | Dihydrolipoyllysine-residue succinyltransferase   | Catalytic activity                                                                    | 2077 | +1.2        |

|                    |                                                                  |                                                                                            |                                     |                                      |
|--------------------|------------------------------------------------------------------|--------------------------------------------------------------------------------------------|-------------------------------------|--------------------------------------|
|                    | component of 2-oxoglutarate dehydrogenase complex, mitochondrial |                                                                                            |                                     |                                      |
| <b>PDLI1_HUMAN</b> | PDZ and LIM domain protein 1                                     | Response to oxidative stress                                                               | 2782                                | -1.2                                 |
| <b>PDIA6_HUMAN</b> | Protein disulfide-isomerase A6                                   | Apoptotic cell clearance                                                                   | 4354                                | -1.2                                 |
| <b>PGM2_HUMAN</b>  | Phosphoglucomutase-2                                             | Glucose metabolic process                                                                  | 1711                                | -1.2                                 |
| <b>PI42A_HUMAN</b> | Phosphatidylinositol 5-phosphate 4-kinase type-2 alpha           | Phospholipid metabolic process                                                             | 4359                                | -1.2                                 |
| <b>PP1R7_HUMAN</b> | Protein phosphatase 1 regulatory subunit 7                       | Positive regulation of pretein dephosphorylation                                           | 4465                                | +1.2                                 |
| <b>SEPT2_HUMAN</b> | Septin-2                                                         | Regulation of L-glutamate transport                                                        | 2547                                | +1.2                                 |
| <b>SEP11_HUMAN</b> | Septin-11                                                        | Cell cycle                                                                                 | 4359                                | -1.2                                 |
| <b>STIP1_HUMAN</b> | Stress-induced-phosphoprotein 1                                  | Protein complex                                                                            | 1858                                | -1.2                                 |
| <b>TBB1_HUMAN</b>  | Tubulin beta-1 chain                                             | Spindle assembly                                                                           | 4354                                | -1.2                                 |
| <b>TPM1_HUMAN</b>  | Tropomyosin alpha-1 chain                                        | Actin-binding                                                                              | 4424                                | -1.2                                 |
| <b>TSP1_HUMAN</b>  | Thrombospondin-1                                                 | Platelet desgranulation, platelet activation and reactive oxygen species metabolic process | 993<br>4405<br>4321<br>4311<br>4403 | +1.2<br>+1.3<br>+1.2<br>+1.2<br>+1.3 |
| <b>TXNL1_HUMAN</b> | Thioredoxin-like protein 1                                       | Cell redox homeostasis                                                                     | 2867                                | +1.2                                 |
| <b>TYPH_HUMAN</b>  | Thymidine phosphorylase                                          | Angiogenesis                                                                               | 2021                                | +1.2                                 |
| <b>VINC_HUMAN</b>  | Vinculin                                                         | Platelet aggregation and platelet degranulation                                            | 933<br>1006                         | +1.2<br>+1.2                         |
| <b>VP37B_HUMAN</b> | Vacuolar protein sorting-associated protein 37B                  | Involved in cell growth and differentiation                                                | 2932                                | -1.2                                 |
| <b>ZYX_HUMAN</b>   | Zyxin                                                            | Regulation of inflammatory response                                                        | 4491<br>4339                        | -1.2<br>-1.3                         |

- a. A positive fold change indicates that the protein feature is up-regulated in obese patients, whereas a negative fold change indicates that the spot is down-regulate.



**Supplementary Table 4. Additional data on MS protein identification**

| Spot | MS method | N <sup>+</sup> /<br>% ‡ | Mascot Score | Peptides identified by MS |                    | Identified protein            | Accession number | MW (exp) /<br>MW(theo) | pI (exp) /<br>pI(theo) | Fold change |
|------|-----------|-------------------------|--------------|---------------------------|--------------------|-------------------------------|------------------|------------------------|------------------------|-------------|
|      |           |                         |              | M + H                     | Sequence           |                               |                  |                        |                        |             |
| 993  | LC-MS     | 9/10,7                  | 519          | 561                       | ALSNVEGFER         | Integrin alpha-IIb            | ITA2B_HUMAN      | 141.3/113.3            | 4.78/5.1               | +1.2        |
|      |           |                         |              | 666                       | FGSAIAPLGLDR       |                               |                  |                        |                        |             |
|      |           |                         |              | 458                       | AEAQVELR           |                               |                  |                        |                        |             |
|      |           |                         |              | 594                       | DGYNDIAVAAPYGGPSGR |                               |                  |                        |                        |             |
|      |           |                         |              | 518,301                   | VYLFLQPR           |                               |                  |                        |                        |             |
|      |           |                         |              | 611,7923                  | NVGSQTLQTFK        |                               |                  |                        |                        |             |
|      |           |                         |              | 539,564                   | HDLLVGAPLYMESR     |                               |                  |                        |                        |             |
|      |           |                         |              | 751,8823                  | GQVLVFLGQSEGLR     |                               |                  |                        |                        |             |
|      |           |                         |              | 803,3217                  | TPVGSCFLAQPESEGR   |                               |                  |                        |                        |             |
|      |           | 5/5.9                   | 270.1        | 530,2687                  | KDHSGQVFSVVSNGK    | Thrombospondin-1              | TSP1_HUMAN       | 141.3/129.3            | 4.78/4.6               |             |
|      |           |                         |              | 808,8687                  | GGVNDNFQGVLQNVK    |                               |                  |                        |                        |             |
|      |           |                         |              | 623,8222                  | TIVTTLQDSIR        |                               |                  |                        |                        |             |
|      |           |                         |              | 625,9483                  | FTGSQPFQGVVEHATANK |                               |                  |                        |                        |             |
|      |           |                         |              | 604,2803                  | SITLQVQEDR         |                               |                  |                        |                        |             |
|      |           | 4/4.3                   | 215.6        | 553,3259                  | SLGEISALTSK        | Vinculin                      | VINC_HUMAN       | 141.3/123.7            | 4.78/5.4               |             |
|      |           |                         |              | 729,3563                  | AQQVSQGLDVLTAK     |                               |                  |                        |                        |             |
|      |           |                         |              | 587,3057                  | ALASQLQDSLK        |                               |                  |                        |                        |             |
|      |           |                         |              | 635,3227                  | AVAGNISDPGLQK      |                               |                  |                        |                        |             |
| 1006 | LC-MS     | 3/2.9                   | 120.9        | 437                       | GNDHIAAAK          | Vinculin                      | VINC_HUMAN       | 140.20/123.7           | 4.81/5.4               | +1.2        |
|      |           |                         |              | 635                       | AVAGNISDPGLQK      |                               |                  |                        |                        |             |
|      |           |                         |              | 560                       | STVEGIQASVK        |                               |                  |                        |                        |             |
|      |           | 2/1.7                   | 81.0         | 458                       | AEAQVELR           | Integrin alpha-IIb            | ITA2B_HUMAN      | 140.20/113.3           | 4.81/5.1               |             |
|      |           |                         |              | 561,2335                  | ALSNVEGFER         |                               |                  |                        |                        |             |
| 1711 | LC-MS     | 5/7.5                   | 215.1        | 600                       | IVLANDPDADR        | Phosphoglucomutase-2          | PGM2_HUMAN       | 67.34/32.72            | 6.08/6.15              | -1.2        |
|      |           |                         |              | 528                       | DLTTGYDSDQPKK      |                               |                  |                        |                        |             |
|      |           |                         |              | 668                       | DTYMLSSSTVSSK      |                               |                  |                        |                        |             |
|      |           |                         |              | 728                       | DLTTGYDSDQPK       |                               |                  |                        |                        |             |
|      |           |                         |              | 438,2078                  | AAMGPGISR          |                               |                  |                        |                        |             |
| 1858 | LC-MS     | 4/6.3                   | 161.0        | 601                       | ETKPEPMEEDLPENK    | Stress-Induces-phosphoprotein | STIP1_HUMAN      | 62.85/62.6             | 6.08/6.4               | -1.2        |
|      |           |                         |              | 532                       | EGLQNMEAR          |                               |                  |                        |                        |             |
|      |           |                         |              | 503                       | AAALEFLNR          |                               |                  |                        |                        |             |
|      |           |                         |              | 644                       | KETKPEPMEEDLPENK   |                               |                  |                        |                        |             |
| 2021 | LC-MS     | 2/7.7                   | 95.1         | 652                       | VAPEEHPVLLTEAPLNPK | Actin, Cytoplasmic 1          | ACTB_HUMAN       | 60.17/41.7             | 5.2/5.2                | +1.2        |

|      |       |        |       |          |                                  |                                                 |             |             |           |      |
|------|-------|--------|-------|----------|----------------------------------|-------------------------------------------------|-------------|-------------|-----------|------|
|      |       |        |       | 600      | DSYVGDEAQS                       |                                                 |             |             |           |      |
|      |       | 1/2.9  | 52.8  | 477      | VAAALTAMDKPLGR                   | Tymidine Phosphorylase                          | TYPH_HUMAN  | 63.54/49.9  | 5.2/5.2   |      |
| 2077 | LC-MS | 4/12.4 | 199.2 | 885      | DNENVVNEYSSELEK                  | Fibrinogen Beta                                 | FIBB_HUMAN  | 59.06/55.9  | 5.5/9.3   | +1.2 |
|      |       |        |       | 513      | AHYGGFTVQNEANK                   |                                                 |             |             |           |      |
|      |       |        |       | 651      | EEAPSLRPAPPPISGGGYR              |                                                 |             |             |           |      |
|      |       |        |       | 655      | QGFGNVATNTD GK                   |                                                 |             |             |           |      |
|      |       | 1/2.9  | 62.9  | 885      | AKPAEAPAAAAPK                    | Dihydrolipoyllysine-Residue Succinyltransferase | ODO2_HUMAN  | 59.06/48.7  | 5.5/9.9   |      |
| 2232 | LC-MS | 6/17.2 | 254.2 | 345      | VGPEADKYR                        | Fibrinogen Gamma                                | FIBG_HUMAN  | 50.54/51.5  | 5.03/5.3  | +1.3 |
|      |       |        |       | 576      | TSTADYAMFK                       |                                                 |             |             |           |      |
|      |       |        |       | 846      | AIQLTYNPDESSKPNMIDAATLK          |                                                 |             |             |           |      |
|      |       |        |       | 498      | YEASILTHDSSIR                    |                                                 |             |             |           |      |
|      |       |        |       | 757,3377 | YLQEIYNSNNQK                     |                                                 |             |             |           |      |
|      |       |        |       | 431,8508 | QSGLYFIKPLK                      |                                                 |             |             |           |      |
| 2547 | LC-MS | 49.8   | 219.1 | 513      | AHYGGFTVQNEANK                   | Fibrinogen Beta                                 | FIBB_HUMAN  | 30.32/55.9  | 6.06/9.3  | +1.2 |
|      |       |        |       | 655      | QGFGNVATNTD GK                   |                                                 |             |             |           |      |
|      |       |        |       | 359      | ISQLTR                           |                                                 |             |             |           |      |
|      |       |        |       | 618      | TMTIHNGMFFSTYDR                  |                                                 |             |             |           |      |
|      |       | 3/12.2 | 146.6 | 816,6186 | MQAQM QM QM QG G D G D G G A L G | Septin-2                                        | SEPT2_HUMAN | 30.32/41.5  | 6.06/6.1  |      |
|      |       |        |       | 401,89   | HHV                              |                                                 |             |             |           |      |
|      |       |        |       | 451,5414 | YLHDESGLNR                       |                                                 |             |             |           |      |
|      |       |        |       |          | ILDEIEEHNK                       |                                                 |             |             |           |      |
| 2550 | MALDI | 9/24   | 136   | 795,54   | IIAPPER                          | Actin, Cytoplasmic 1                            | ACTB_HUMAN  | 30.16/42.05 | 5.26/5.29 | +1.2 |
|      |       |        |       | 976,54   | AGFAGDDAPR                       |                                                 |             |             |           |      |
|      |       |        |       | 1132,63  | GYSFTTTAER                       |                                                 |             |             |           |      |
|      |       |        |       | 1198,81  | AVFPSIVGRPR                      |                                                 |             |             |           |      |
|      |       |        |       | 1791,04  | SYELPDGQVITIGNER                 |                                                 |             |             |           |      |
|      |       |        |       | 1954,23  | VAPEEHPVLLTEAPLNPK               |                                                 |             |             |           |      |
|      |       |        |       | 2231,23  | DLYANTVLSGGT T M Y P G I A D R   |                                                 |             |             |           |      |
|      |       | 9/24   | 136   | 795,54   | IIAPPER                          | Actin, Cytoplasmic 2                            | ACTG_HUMAN  | 30.16/41.79 | 5.26/5.31 | OR   |
|      |       |        |       | 976,54   | AGFAGDDAPR                       |                                                 |             |             |           |      |
|      |       |        |       | 1132,63  | GYSFTTTAER                       |                                                 |             |             |           |      |
|      |       |        |       | 1198,81  | AVFPSIVGRPR                      |                                                 |             |             |           |      |
|      |       |        |       | 1791,04  | SYELPDGQVITIGNER                 |                                                 |             |             |           |      |
|      |       |        |       | 1954,23  | VAPEEHPVLLTEAPLNPK               |                                                 |             |             |           |      |

|      |       |        |       |                                                                                               |                                                                                                                          |                                             |             |              |            |      |
|------|-------|--------|-------|-----------------------------------------------------------------------------------------------|--------------------------------------------------------------------------------------------------------------------------|---------------------------------------------|-------------|--------------|------------|------|
|      |       |        |       | 2231,23                                                                                       | DLYANTVLSGGTTMYPGIADR                                                                                                    |                                             |             |              |            |      |
| 2787 | LC-MS | 3/10.9 | 201.0 | 800<br>480<br>588                                                                             | SAMPFTASPASSTTAR<br>VAASIGNAQK<br>DFEQPLAISR                                                                             | PDZ and LIM domain<br>protein 1             | PDLI1_HUMAN | 13.71/36.07  | 6.18/6.56  | -1.2 |
| 2867 | LC-MS | 6/28   | 278.7 | 637<br>573<br>565<br>681<br>584,7476<br>733,6486                                              | QHLENDPGSNEDTDIPK<br>FQGPDNGQGPK<br>SMDFEEAER<br>GYMDLMPFINK<br>IAPAFSSMSNK<br>VGVKPVGSDPDFQPELSGAGSR                    | Thioredoxin-like                            | TXNL1_HUMAN | 13.60/32.2   | 4.92/4.7   | +1.2 |
| 2898 |       | 5/11.4 | 265.4 | 301<br>355<br>411<br>642<br>538,2157                                                          | SLKPDSVR<br>SQLETSLKR<br>RMDAPASAAAVR<br>VASVLGTMEMGR<br>MDAPASAAAVR                                                     | Aflatoxin B1 aldehyde<br>reductase member 2 | ARK72_HUMAN | 14.21/39.58  | 6.37/6.70  | -1.2 |
| 2932 | LC-MS | 2/7.7  | 122.5 | 451<br>663                                                                                    | MEETQNVQLNK<br>IEEDTENMAEK                                                                                               | Vacuolar Protein                            | VP37B_HUMAN | 15.39/31.3   | 6.21/7.6   | -1.2 |
|      |       | 2/6.4  | 86.8  | 525<br>598                                                                                    | LAEVALAYAK<br>AAVLEAMTAFR                                                                                                | Delta-aminolevulinic                        | HEM2_HUMAN  | 15.39/36.3   | 6.21/6.4   |      |
| 3287 | MALDI | 12/42  | 383   | 831,58<br>987,68<br>1075,66<br>1104,6<br>1163,72<br>1643,95<br>1784,06<br>1906,15             | VPFSLLR<br>RVPFSLLR<br>QLSSGVSEIR<br>QDEHGYISR<br>LFDQAFGLPR<br>AQLGGPEAAKSDETA<br>VSLDVNHFAPDELTVK<br>LATQSNEITIPVTFESR | Heat shock protein beta-1                   | HSPB1_HUMAN | 24.74/22.86  | 5.89/5.98  | -1.2 |
| 4304 | MALDI | 12/26  | 98    | 851,5<br>1034,61<br>1037,63<br>1045,66<br>1117,62<br>1150,61<br>1194,59<br>1293,86<br>1513,85 | NWIQYK<br>VGPEADKYR<br>KMLEEIMK<br>TSEVKQLIK<br>VELEDWNGR<br>TSTADYAMFK<br>DNCCILDER<br>QSGLYFIKPLK<br>YLQEIYNSNNQK      | Fibrinogen Gamma                            | FIBG_HUMAN  | 49.13/52.101 | 4.87/ 5.37 | +1.2 |

|      |       |        |       |                                                                                             |                                                                                                                                                          |                              |                  |              |            |      |
|------|-------|--------|-------|---------------------------------------------------------------------------------------------|----------------------------------------------------------------------------------------------------------------------------------------------------------|------------------------------|------------------|--------------|------------|------|
|      |       |        |       | 1683,1<br>2536,46                                                                           | IHLISTQSAIPYALR<br>AIQLTYNPDESSKPNMIDAATLK                                                                                                               |                              |                  |              |            |      |
| 4311 | LC-MS | 1/0.9  | 45.5  | 624                                                                                         | TIVTTLQDSIR                                                                                                                                              | Thrombospondin-1             | TSP1_HUMAN       | 129.61/129.3 | 4.95/4.6   | +1.2 |
| 4320 | MALDI | 6/26   | 72    | 788,44<br>1012,49<br>1179,64<br>1400,72                                                     | AWVAWR<br>WESGYNTR<br>VFERCELAR<br>STDYGIFQINSR                                                                                                          | Lysozyme C                   | LYSC_HUMAN       | 77.72/16.98  | 4.35/9.38  | -1.3 |
| 4321 | LC-MS | 4/4    | 200.7 | 530<br>516<br>373<br>809                                                                    | KDHSGQVFSVVSNGK<br>GDPSPSPAFR<br>DLASIR<br>GGVNDNFQGVLQNVR                                                                                               | Thrombospondin-1             | TSP1_HUMAN       | 127.83/129.3 | 4.99/4.6   | +1.2 |
| 4325 | LC-MS | 7/25.3 | 374.6 | 896<br>506<br>589<br>323<br>566,7203<br>652,0153<br>744,3243                                | SYELPDGQVITIGNER<br>QEYDESGPSIVHR<br>EITALAPSTMK<br>LDLAGR<br>GYSFTTTAER<br>VAPEEHPVLLTEAPLNPK<br>DLYANTVLSGGTTMYPGIADR                                  | Actin, Cytoplasmic 1         | ACTB_HUMAN       | 20.71/41.7   | 5.49/5.2   | +1.3 |
|      |       | 2/5.3  |       | 82.8                                                                                        | 497,8928<br>431,9183                                                                                                                                     | YEASILTHDSSIR<br>QSGLYFIKPLK | Fibrinogen Gamma | FIBG_HUMAN   | 20.71/51.5 |      |
| 4339 | MALDI | 12/20  | 214   | 749,46<br>775,49<br>881,5<br>1037,67<br>1039,71<br>1515,84<br>1710,03<br>1989,16<br>2597,49 | FTPVASK<br>FSPVTPK<br>CHQPLAR<br>SPGAPGPLTLK<br>FGPVVAPKPK<br>FSPGAPGGSGSQPNQK<br>QHPVPPPAQNQNQVR<br>VNPFRPGDSEPPAPGAQR<br>LGHPEALSAGTGSPQPPSFTYAQQ<br>R | Zyxin                        | ZYX_HUMAN        | 89.89/62.43  | 6.21/8.59  | -1.3 |
| 4344 | MALDI | 6/15   | 62    | 1045,71<br>1293,92<br>1491,96<br>1513,94<br>2536,6                                          | TSEVKQLIK<br>QSGLYFIKPLK<br>YEASILTHDSSIR<br>YLQEIYNSNNQK<br>AIQLTYNPDESSKPNMIDAATLK                                                                     | Fibrinogen gamma             | FIBG_HUMAN       | 22.18/52.101 | 5.45/5.37  | +1.2 |



|      |       |        |       |                                                                                                                                                 |                                                                                                                                                                                   |                             |             |             |           |      |
|------|-------|--------|-------|-------------------------------------------------------------------------------------------------------------------------------------------------|-----------------------------------------------------------------------------------------------------------------------------------------------------------------------------------|-----------------------------|-------------|-------------|-----------|------|
| 4348 | MALDI | 17/34  | 166   | 722,41<br>744,51<br>777,41<br>810,46<br>875,53<br>894,55<br>926,52<br>1073,66<br>1109,59<br>1186,77<br>1243,76<br>1314,87<br>1475,88<br>1728,04 | AEFAER<br>LATALQK<br>AADESER<br>KMQMLK<br>SLEAQAEK<br>YEEVARK<br>HIAEDADR<br>LDKENALDR<br>AADESERGMK<br>LVIIESDLER<br>IQLVEEELDR<br>KLVIIESDLER<br>MEIQEIQKKEAK<br>IQLVEEELDRAQER | Tropomyosin alpha-1 chain   | TPM1_HUMAN  | 13.10/32.74 | 4.71/4.69 | -1.2 |
| 4354 | LC-MS | 7/20.4 | 351.8 | 708<br>473<br>848<br>668<br>779,9624<br>544,6017<br>580,3036                                                                                    | EVDQQLLSVQTR<br>GASALQLER<br>ALSVAELTQQMFDAR<br>ISVYYNEAYGR<br>AVLEEDDEEVTEEAEMEPEDK<br>AVLVDLEPGTMD SIR<br>LAVNMVPFPR                                                            | Tubulin beta-1              | TBB1_HUMAN  | 57.70/50.3  | 5.01/4.9  | +1.2 |
|      |       | 4/10.5 | 163.6 | 384,8861<br>405,163<br>516,2628<br>883,4082                                                                                                     | QLLVASHLEK<br>GLDFSDR<br>LTELETAVR<br>ENLATVEGNFASIDER                                                                                                                            | Dynactin Subunit2           | DCTN2_HUMAN | 57.70/44.2  | 5.01/5    |      |
|      |       | 3/8.6  | 145.7 | 397,8601<br>808,3937<br>576,1825                                                                                                                | NRPEDYQGGR<br>GSTAPVGGGAFPTIVER<br>GESPVDYDGGR                                                                                                                                    | Protein Disulfide-isomerase | PDIA6_HUMAN | 557.70/48.1 | 5.01/4.8  |      |
| 4356 | MALDI | 22/54  | 275   | 744,44<br>775,46<br>826,54<br>893,54<br>903,56<br>954,61<br>1001,68<br>1014,59                                                                  | TPEELR<br>ADAETLR<br>SVSHLRK<br>QEISAAFK<br>ADAETLRK<br>FITIFGTR<br>VLTEIIASR<br>LYDAYELK                                                                                         | Annexin A5                  | ANXA5_HUMAN | 18.05/35.97 | 4.85/4.93 | +1.3 |

|      |       |        |       |                                                                                                         |                                                                                                                                                                          |                                                        |             |             |           |      |
|------|-------|--------|-------|---------------------------------------------------------------------------------------------------------|--------------------------------------------------------------------------------------------------------------------------------------------------------------------------|--------------------------------------------------------|-------------|-------------|-----------|------|
|      |       |        |       | 1106,67<br>1143,78<br>1155,67<br>1172,76<br>1234,77<br>1290,73<br>1340,71<br>1705,02<br>1750<br>2888,45 | SEIDLFNIR<br>LIVALMKPSR<br>GAGTDDHTLIR<br>MLVVLLQANR<br>SEIDLFNIRK<br>NFATSLYSMIK<br>GTVTDFPGFDER<br>GLGTDEESILLLTSR<br>SIPAYLAETLYYAMK<br>QVYEEYGGSSLEDDVVGDTSQYY<br>QR |                                                        |             |             |           |      |
|      |       | 6/9    | 121   | 927,57<br>1149,69<br>1640,06<br>1911,03                                                                 | YLYEIAR<br>LVNEVTEFAK<br>KVPQVSTPTLVEVSR<br>RPCFSALEVDETYVPK                                                                                                             | Serum Albumin                                          | ALBU_HUMAN  | 18.05/69.3  | 4.85/5.9  |      |
| 4359 | LC-MS | 6/15.4 | 340.2 | 653<br>696<br>690<br>644<br>519,2193<br>612,7728                                                        | AAAQLLQSQAAQSGAQQTK<br>KAAAQLLQSQAAQSGAQQTK<br>ELEEENNFQK<br>STLMDTLFNTK<br>FESDPATHNEPGVR<br>SYELQESNVR                                                                 | Septin-11                                              | SEP11_HUMAN | 54.15/49.39 | 6.62/6.36 | -1.2 |
|      |       | 2/5.2  | 88.7  | 590,2191<br>578,24                                                                                      | DNDFINEGQK<br>SAPLPNDSQAR                                                                                                                                                | Phosphatidylinositol 5-phosphate 4-kinase type-2 alpha | PI42A_HUMAN | 54.15/46.22 | 6.62/6.50 |      |
| 4361 | MALDI | 12/42  | 383   | 831,58<br>987,68<br>1075,66<br>1104,6<br>1163,72<br>1643,95<br>1784,06<br>1906,15                       | VPFSLLR<br>RVPFSLLR<br>QLSSGVSEIR<br>QDEHGYISR<br>LFDQAFGLPR<br>AQLGGPEAAKSDETAAK<br>VSLDVNHFAPDELTVK<br>VSLDVNHFAPDELTVK<br>LATQSNEITIPVTFESR                           | Heat shock protein beta-1                              | HSPB1_HUMAN | 24.29/22.86 | 5.89/5.98 | -1.2 |
| 4400 | LC-MS | 9/10.9 | 484.7 | 392<br>581<br>633                                                                                       | SSYVLSK<br>MNLAIALTAAR<br>SMAEDTINAAVK                                                                                                                                   | Glycerol-3-phosphate dehydrogenase, mitochondrial      | GPDM_HUMAN  | 64.70/80.82 | 6.37/7.58 | -1.4 |

|      |       |        |        |                                                                          |                                                                                                                     |                      |             |              |           |      |
|------|-------|--------|--------|--------------------------------------------------------------------------|---------------------------------------------------------------------------------------------------------------------|----------------------|-------------|--------------|-----------|------|
|      |       |        |        | 488<br>417,2137<br>474,2226<br>574,3066<br>332,6644<br>529,6788          | QEQLLETAR<br>IVELMGR<br>TAEENLDR<br>GFITIVDVQR<br>AFEVAK<br>DDFSSGTSSR                                              |                      |             |              |           |      |
| 4403 | LC-MS | 7/7.3  | 129.30 | 826<br>626<br>667<br>516<br>422,7228<br>531,7262<br>530,2393             | DCVGDVTENQICNK<br>FTGSQPFQGVVEHATANK<br>LCNNPTPQFGGK<br>GPDSPSPAFR<br>ELANELR<br>FQDLVDAVR<br>KDHSGQVFSVVSNGK       | Thrombospondin-1     | TSP1_HUMAN  | 124.87/129.3 | 5.08/4.6  | +1.3 |
|      |       | 2/2.7  | 103    | 493,1916<br>677,7483                                                     | LSNRPAFMPSEGR<br>GISQEQMNEFR                                                                                        | Alpha-actinin-1      | ACTN1_HUMAN | 124.87/103   | 5.08/5.1  |      |
| 4405 | LC-MS | 7/7.8  | 414.7  | 624<br>809<br>667<br>516<br>625,9361<br>604,2892<br>530,2655             | TIVTTLQDSIR<br>GGVNDNFQGVVQNVR<br>LCNNPTPQFGGK<br>GPDSPSPAFR<br>FTGSQPFQGVVEHATANK<br>SITLQVQEDR<br>KDHSGQVFSVVSNGK | Thrombospondin-1     | TSP1_HUMAN  | 126.35/129.3 | 5.04/4.6  | +1.3 |
|      |       | 2/7.5  | 74.5   | 652,0124<br>488,7376                                                     | VAPEEHPVLLTEAPLNPK<br>AGFAGDDAPR                                                                                    | Actin, Cytoplasmic 1 | ACTB_HUMAN  | 126.35/41.7  | 5.04/5.2  |      |
|      |       | 1/1.6  | 55.2   | 769,3351                                                                 | FAIQDISVEETSAK                                                                                                      | Alpha-actinin-1      | ACTN1_HUMAN | 126.35/103   | 5.04/5.1  |      |
| 4424 | LC-MS | 8/20.8 | 403.6  | 574<br>373<br>825<br>404<br>358,5302<br>622,3107<br>657,8473<br>593,8076 | MEIQEIQLK<br>LATALQK<br>DEEKMEIQEIQLK<br>EDRYEEEIK<br>LDKENALDR<br>IQLVEEELDR<br>KLVHIESDLER<br>LVHIESDLER          | Trompomyosin Alpha-1 | TPM1_HUMAN  | 22.02/32.7   | 4.71/4.5  | -1.2 |
|      |       | 1/2.5  | 73.4   | 547,3077                                                                 | KVPQVSTPTLVEVSR                                                                                                     | Serum Albumin        | ALBU_HUMAN  | 22.02/69.3   | 4.71/5.9  |      |
| 4461 | MALDI | 15/32  | 416    | 795,53                                                                   | IIAPPER                                                                                                             | Actin, Cytoplasmic 1 | ACTB_HUMAN  | 20.99/42.05  | 5.29/5.29 | +1.2 |

|      |       |        |       |                                                                                                          |                                                                                                                                                                       |                       |             |              |           |  |      |
|------|-------|--------|-------|----------------------------------------------------------------------------------------------------------|-----------------------------------------------------------------------------------------------------------------------------------------------------------------------|-----------------------|-------------|--------------|-----------|--|------|
|      |       |        |       | 923,63<br>1014,57<br>1132,61<br>1177,69<br>1516,82<br>1791,03<br>1911,01<br>1954,21<br>2231,23           | IIAPPERK<br>DLTDYLMK<br>GYSFTTTAER<br>EITALAPSTMK<br>QEYDESGPSIVHR<br>SYELPDGQVITIGNER<br>MDDDIAALVVDNGSGMCK<br>VAPEEHPVLLTEAPLNPK<br>DLYANTVLSGGTTMYPGIADR           |                       |             |              |           |  | OR   |
|      |       |        |       | 795,53<br>923,63<br>1014,57<br>1132,61<br>1177,69<br>1516,82<br>1791,03<br>1851,98<br>1954,21<br>2231,23 | IIAPPER<br>IIAPPERK<br>DLTDYLMK<br>GYSFTTTAER<br>EITALAPSTMK<br>QEYDESGPSIVHR<br>SYELPDGQVITIGNER<br>EEEIAALVIDNGSGMCK<br>VAPEEHPVLLTEAPLNPK<br>DLYANTVLSGGTTMYPGIADR | Actin, Cytoplasmic 2  | ACTG_HUMAN  | 20.99/42.05  | 5.29/5.31 |  |      |
| 4465 | LC-MS | 6/13.5 | 300.7 | 441<br>757<br>346<br>432<br>351,8449<br>497,9094                                                         | LDGSVDFK<br>YLQEIYNSNNQK<br>VGPEADKYR<br>QSGLYFIKPLK<br>KMLEEIMK<br>YEASILTHDSSIR                                                                                     | Fibrinogen Gamma      | FIBG_HUMAN  | 49.29/51.5   | 4.81/5.3  |  | +1.2 |
|      |       | 2/6.7  | 124.1 | 555,2467<br>575,8878                                                                                     | SLETVYLER<br>GAGQQSQEMMEVDR                                                                                                                                           | Protein Phosphatase 1 | PP1R7_HUMAN | 49.29/41.5   | 4.81/4.7  |  |      |
|      |       | 2/5.1  | 100.8 | 452,1944<br>442,5648                                                                                     | GISQEQMNEFR<br>RDQALTEEHR                                                                                                                                             | Alpha-actinin-1       | ACTN1_HUMAN | 49.29/103    | 4.81/5.1  |  |      |
| 4491 | LC-MS | 4/10.8 | 213.0 | 571<br>539<br>664<br>506                                                                                 | QHPVPPPAQNQNQVR<br>GPPASSPAPAPK<br>VNPFRPGDSEPPAPGAQR<br>FSPGAPGSGSQPNQK                                                                                              | Zyxin                 | ZYX_HUMAN   | 91.07/61.2   | 6.13/6.2  |  | -1.2 |
| 4505 | MALDI | 23/20  | 262   | 747,44<br>839,46<br>839,46                                                                               | ANSAGATR<br>MDAHPPR<br>LFACSNK                                                                                                                                        | Gelsolin              | GELS_HUMAN  | 102.33/86.04 | 5.5/5.9   |  | -1.3 |

|      |       |        |      |                                                                                                                                                                      |                                                                                                                                                                                                                                               |          |            |             |         |      |
|------|-------|--------|------|----------------------------------------------------------------------------------------------------------------------------------------------------------------------|-----------------------------------------------------------------------------------------------------------------------------------------------------------------------------------------------------------------------------------------------|----------|------------|-------------|---------|------|
|      |       |        |      | 847,47<br>850,54<br>859,51<br>887,57<br>913,66<br>967,56<br>998,62<br>1074,62<br>1078,61<br>1165,69<br>1254,8<br>1275,83<br>1319,81<br>1349,76<br>1830,11<br>2479,41 | LFQVKGR<br>KGGVASGFK<br>GIRDNER<br>TGAQELLR<br>RTPITVVK<br>KMDAHPPR<br>EPGLQIWR<br>EGGQTAPASTR<br>YIETDPANR<br>LFACSNKIGR<br>AGKEPGLQIWR<br>HVVPNEVVVQR<br>AGALNSNDAFVLK<br>YIETDPANRDR<br>QTQVSVLPEGGETPLFK<br>VSNGAGTMSVSLVADENPFAQG<br>ALK |          |            |             |         |      |
| 4508 | LC-MS | 8/11.1 | 85.6 | 379<br>444<br>556<br>426<br>610,6398<br>660,3282<br>378,2259<br>539,7373                                                                                             | TPITVVK<br>TGAQELLR<br>DSQEEKTEALTSK<br>HVVPNEVVVQR<br>QTQVSVLPEGGETPLFK<br>AGALNSNDAFVLK<br>AVEVLPK.A<br>R.YIETDPANR                                                                                                                         | Gelsolin | GELS_HUMAN | 102.93/85.6 | 5.5/5.9 | -1.2 |

a. Identifications were by MALDI-MS/MS in 11 spots and by LC-MS/MS in 24 spots. † Number of matched peptides. ‡ % coverage of full length protein by tryptic peptides. All differential proteins have a p value lower than 0.05.

**Supplementary Table 5.** Aggregation data corresponding to Figure 3, representing agonists, condition, doses, cohort and p value (Mann-Whitney test).

|      | <b>Condition</b> | <b>Doses<br/>(<math>\mu\text{g/mL}</math>)</b> | <b>n</b> | <b>p-value</b> |
|------|------------------|------------------------------------------------|----------|----------------|
| CRP  | PRP              | 0.1                                            | 18       | 0.049          |
|      |                  | 0.15                                           | 20       | 0.0048         |
|      |                  | 0.2                                            | 18       | 0.0083         |
| CRP  | Washed platelets | 0.4                                            | 20       | 0.356          |
|      |                  | 0.5                                            | 20       | 0.092          |
|      |                  | 1                                              | 20       | 0.0015         |
| COLL | PRP              | 0.5                                            | 20       | 0.059          |
|      |                  | 0.75                                           | 20       | 0.0002         |
|      |                  | 1                                              | 17       | 0.022          |
| COLL | Washed platelets | 1                                              | 20       | 0.56           |
|      |                  | 2                                              | 19       | 0.81           |
|      |                  | 3                                              | 19       | 0.60           |

a. CRP: collagen-related peptide; COLL: collagen.

**Supplementary Table 6.** Aggregation data corresponding to Supplementary Figure 2, representing agonists, condition, doses, cohort and p value (Mann-Whitney test).

|     | <b>Condition</b> | <b>Doses</b>    | <b>n</b> | <b>p-value</b> |
|-----|------------------|-----------------|----------|----------------|
| RHO | PRP              | 25 nM           | 20       | 0.61           |
|     |                  | 50 nM           | 20       | 0.08           |
| RHO | Washed platelets | 25 nM           | 20       | 0.71           |
|     |                  | 50 nM           | 20       | 0.91           |
|     |                  | 100 nM          | 18       | 0.35           |
| ADP | PRP              | 2 $\mu\text{M}$ | 11       | 0.7            |
|     |                  | 3 $\mu\text{M}$ | 8        | 0.1            |
| AA  | PRP              | 0.3 mM          | 9        | 0.15           |
|     |                  | 0.5 mM          | 5        | 0.66           |
| THR | Washed platelets | 0.5 u/mL        | 14       | 0.8            |
|     |                  | 0.75 u/mL       | 20       | 0.3            |

a. RHO: rhodocytin; AA: arachidonic acid; THR: thrombin.

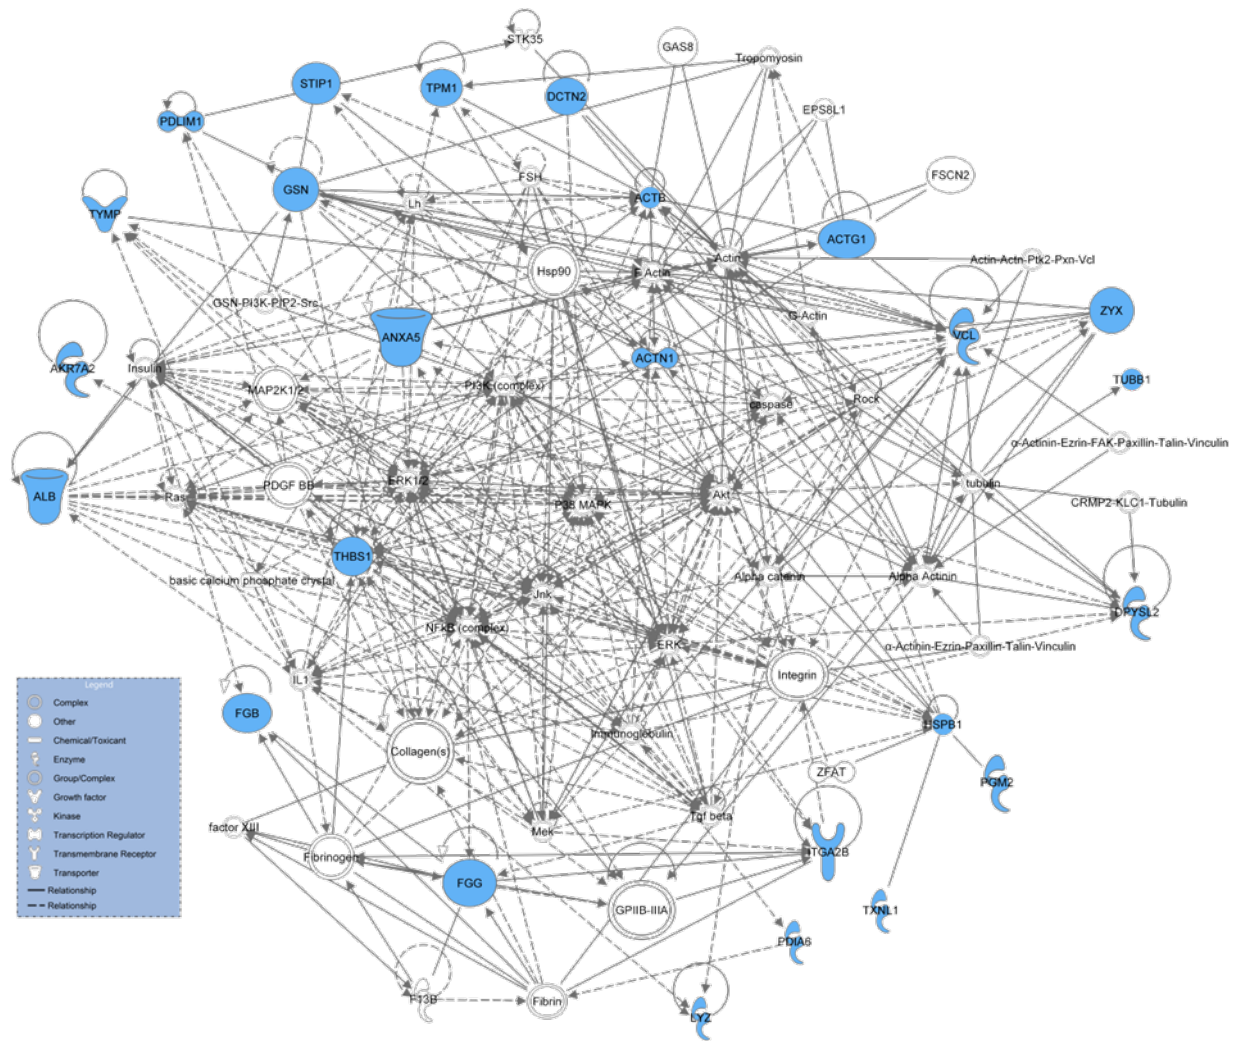

**Supplementary Fig. 1: Ingenuity Pathway Analysis (IPA) of the proteomic results identifies a protein network related to Cell-To-Cell Signaling and Interaction, Hematological System Development and Function and Inflammatory Response altered in obesity.** Proteins identified by differential analysis are shown as shaded nodes with their gene names. Solid lines represent direct interactions, dotted represent indirect interactions.

**(A)**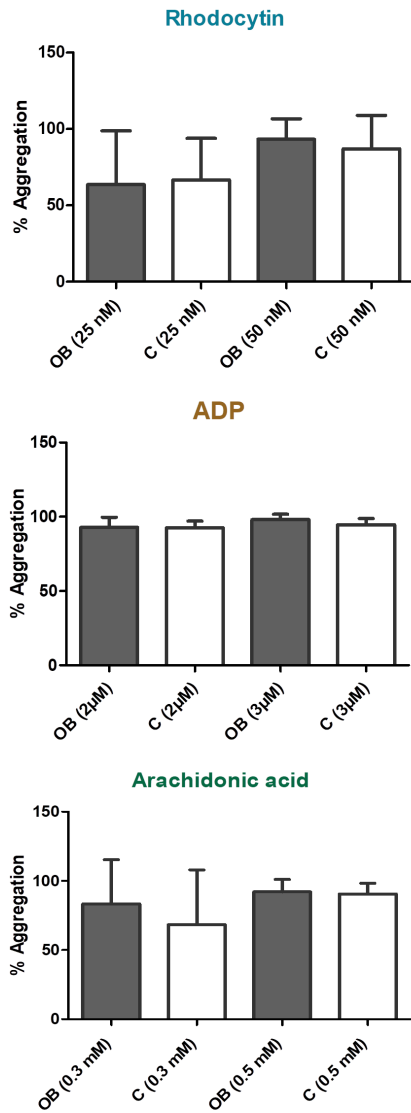**(B)**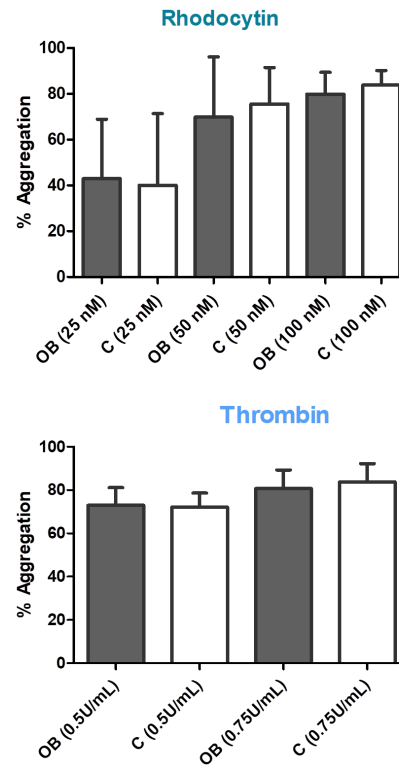

**Supplementary Fig. 2: Aggregation studies showing no differences between platelets from obese and lean individuals in response to various agonists.** PRP and washed platelets were stimulated with rhodocytin (CLEC-2 agonist); or with non-SFKs-mediated signaling pathways agonists such as ADP, arachidonic acid and thrombin (A) PRP was stimulated with rhodocytin (25nM and 50nM), ADP (2 and 3  $\mu$ M) and arachidonic acid (0.3 and 0.5 mM) to trigger aggregation. (B) Washed platelets were stimulated with rhodocytin (25, 50 and 100nM) and thrombin (0.5 and 0.75 u/mL).



Results are presented as mean  $\pm$ SD; P-values and cohort data are shown in Supplementary Table 6. OB: obese; C: control.

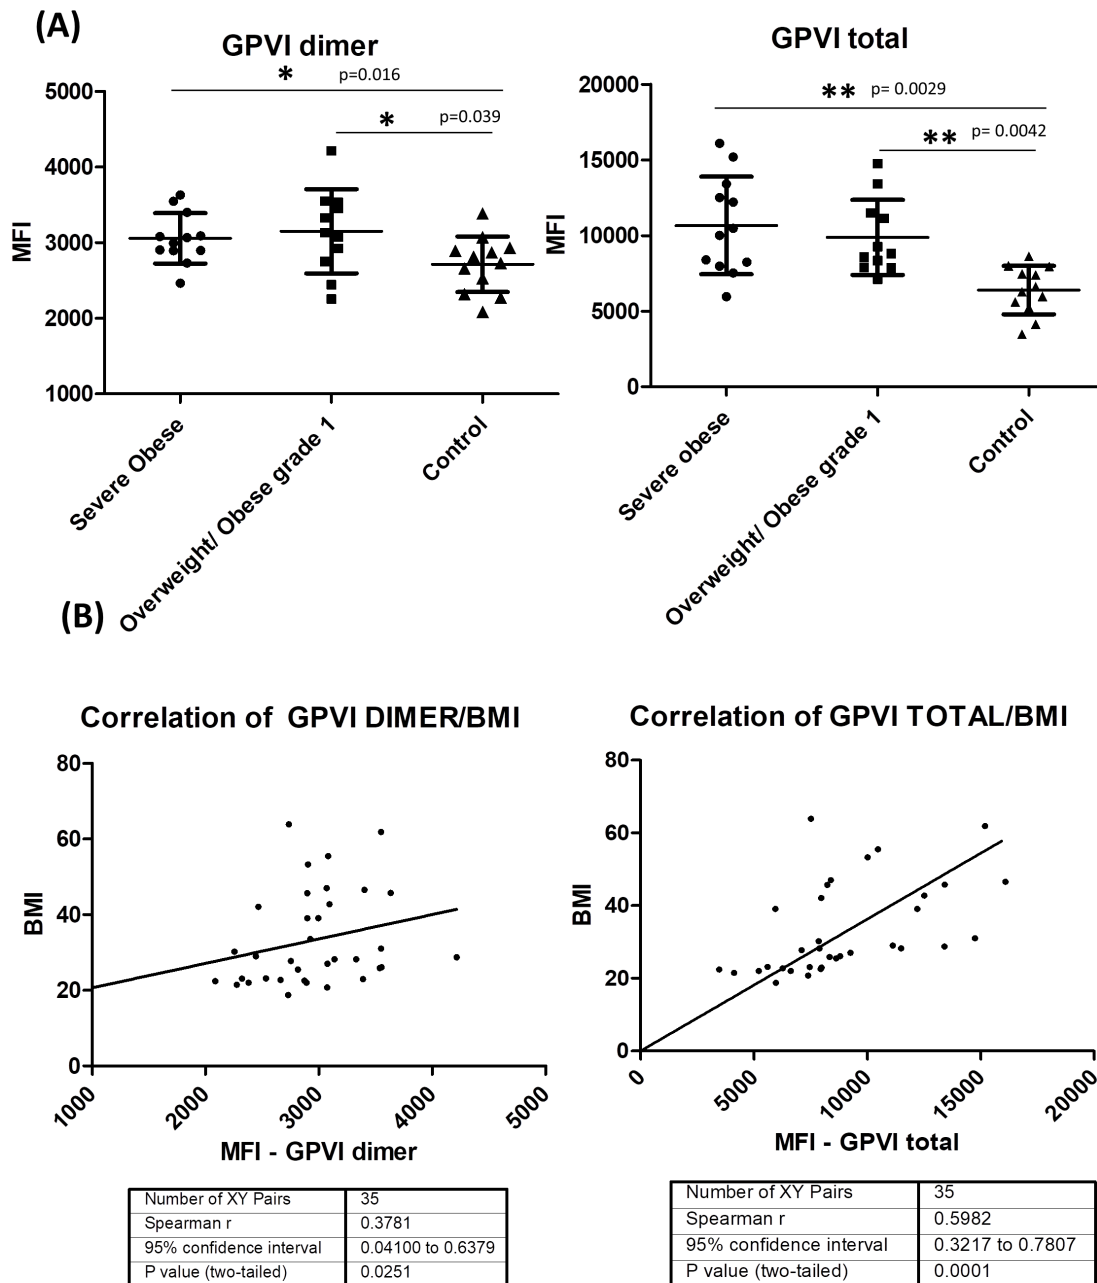

**Supplementary Fig. 3: Higher expression levels of GPVI (total and dimer) in the surface of platelets from obese and overweight individuals compared to lean controls, with a positive correlation with BMI. The study was performed with a**

subgroup of 12 severe obese patients, their 12 lean matched-controls, and an additional group of 11 overweight and obese grade 1 individuals (BMI between 26 and 35). (A) GPVI dimer and total levels of GPVI are increased in the obese groups. Fluorescence values are shown as mean  $\pm$  SD. Measures were done in triplicate. Significant differences are indicated as follow: \* $p < 0.05$ , \*\* $p < 0.01$ . (B) Positive correlations between BMI and total GPVI and GPVI dimer were found using Spearman's test.
